# Supplementary material for: Pharmacy-based dispensing of antimicrobial agents without prescription in India: appropriateness and cost burden in the private sector
Source: PubMed Central journal article supplement (PMC4676185; doi:10.1186/s13756-015-0098-8), 2015-12-11
Supplement: 13756_2015_98_MOESM1_ESM.pdf [file 13756_2015_98_MOESM1_ESM.pdf]

### URTI simulation questionnaire

|                                                                                                                                                                                                                                                                                                                                                                                                                                                                                                                       |                                             |                                                       |
|-----------------------------------------------------------------------------------------------------------------------------------------------------------------------------------------------------------------------------------------------------------------------------------------------------------------------------------------------------------------------------------------------------------------------------------------------------------------------------------------------------------------------|---------------------------------------------|-------------------------------------------------------|
| <b>Date:</b>                                                                                                                                                                                                                                                                                                                                                                                                                                                                                                          | <b>Time:</b>                                |                                                       |
| <b>Pharmacy Name and Address (inc Phone)</b>                                                                                                                                                                                                                                                                                                                                                                                                                                                                          | <b>Pharmacy No: (from listing)</b>          |                                                       |
|                                                                                                                                                                                                                                                                                                                                                                                                                                                                                                                       | <b>Language used:</b>                       |                                                       |
|                                                                                                                                                                                                                                                                                                                                                                                                                                                                                                                       | <b>Research assistant:</b>                  |                                                       |
| <p>You have a cough, running nose and fever since a few days. You go to the pharmacy and ask for treatment for this.</p>                                                                                                                                                                                                                                                                                                                                                                                              |                                             |                                                       |
| <p><b>Section 1 (Questions)</b> Wait for the 'pharmacist' to respond now. If he asks you any of the following questions, these should be your answers. If no questions asked, mark N in the last column and skip to section 2.</p>                                                                                                                                                                                                                                                                                    |                                             |                                                       |
| <b>Question</b>                                                                                                                                                                                                                                                                                                                                                                                                                                                                                                       | <b>Your answer</b>                          | <b>Pharmacist asked question (Y/N)</b>                |
| How long since you have the cold/cough/ fever (circle which symptom he asked)?                                                                                                                                                                                                                                                                                                                                                                                                                                        | 4 days                                      |                                                       |
| Is the fever high?                                                                                                                                                                                                                                                                                                                                                                                                                                                                                                    | I haven't measured, just know I am feverish |                                                       |
| Any headache / body ache?                                                                                                                                                                                                                                                                                                                                                                                                                                                                                             | Occasionally                                |                                                       |
| Any sputum?                                                                                                                                                                                                                                                                                                                                                                                                                                                                                                           | Yes                                         |                                                       |
| List any other questions he asks you and your response.                                                                                                                                                                                                                                                                                                                                                                                                                                                               |                                             |                                                       |
| <p><b>Section 2 treatment.</b> If no antibiotics are prescribed, ask the pharmacist the following: Can you give me a strong medicine for this. I have a lot of work to finish in the next 2 days.<br/>         If cough syrup is given, record details below and at the end of the interaction say you will buy it later.<br/>         If antibiotics are prescribed, ask if it is ok that you just buy today's dose for now and buy only that much.<br/>         Record the details below (indicate antibiotic).</p> |                                             |                                                       |
| <b>Name of drug</b>                                                                                                                                                                                                                                                                                                                                                                                                                                                                                                   | <b>Particulars he tells you (Y/N)</b>       | <b>Details of particulars (NA if not told)</b>        |
| 1.                                                                                                                                                                                                                                                                                                                                                                                                                                                                                                                    | Dosage<br>Duration<br>Side effects          |                                                       |
| 2.                                                                                                                                                                                                                                                                                                                                                                                                                                                                                                                    | Dosage<br>Duration<br>Side effects          |                                                       |
| Prescribes antibiotics                                                                                                                                                                                                                                                                                                                                                                                                                                                                                                | Y/N                                         | (if Y fill particulars below, else skip to section 3) |
| <b>Name of antibiotic</b>                                                                                                                                                                                                                                                                                                                                                                                                                                                                                             | <b>Particulars he tells you (Y/N)</b>       | <b>Details of particulars (NA if not told)</b>        |
| 1.                                                                                                                                                                                                                                                                                                                                                                                                                                                                                                                    | Dosage<br>Duration<br>Side effects          |                                                       |
| 2.                                                                                                                                                                                                                                                                                                                                                                                                                                                                                                                    | Dosage<br>Duration<br>Side effects          |                                                       |
| <p><b>Section 3 (Advice).</b> List non pharmacological advice if any</p>                                                                                                                                                                                                                                                                                                                                                                                                                                              |                                             |                                                       |
| Advice                                                                                                                                                                                                                                                                                                                                                                                                                                                                                                                | Y/N                                         |                                                       |
| Steam inhalation                                                                                                                                                                                                                                                                                                                                                                                                                                                                                                      |                                             |                                                       |
| Visit a doctor                                                                                                                                                                                                                                                                                                                                                                                                                                                                                                        |                                             |                                                       |
| Other (list)                                                                                                                                                                                                                                                                                                                                                                                                                                                                                                          |                                             |                                                       |

### URTI simulation questionnaire

|                                                                                                                                                                                                                                                                                                                                                                                                                                                                                |                                             |                                                              |
|--------------------------------------------------------------------------------------------------------------------------------------------------------------------------------------------------------------------------------------------------------------------------------------------------------------------------------------------------------------------------------------------------------------------------------------------------------------------------------|---------------------------------------------|--------------------------------------------------------------|
| <b>Date:</b>                                                                                                                                                                                                                                                                                                                                                                                                                                                                   | <b>Time:</b>                                |                                                              |
| <b>Pharmacy Name and Address (inc Phone)</b>                                                                                                                                                                                                                                                                                                                                                                                                                                   | <b>Pharmacy No: (from listing)</b>          |                                                              |
|                                                                                                                                                                                                                                                                                                                                                                                                                                                                                | <b>Language used:</b>                       |                                                              |
|                                                                                                                                                                                                                                                                                                                                                                                                                                                                                | <b>Research assistant:</b>                  |                                                              |
| You have a cough, running nose and fever since a few days. You go to the pharmacy and ask for treatment for this.                                                                                                                                                                                                                                                                                                                                                              |                                             |                                                              |
| <b>Section 1 (Questions)</b> <i>Wait for the 'pharmacist' to respond now. If he asks you any of the following questions, these should be your answers. If no questions asked, mark N in the last column and skip to section 2.</i>                                                                                                                                                                                                                                             |                                             |                                                              |
| <b>Question</b>                                                                                                                                                                                                                                                                                                                                                                                                                                                                | <b>Your answer</b>                          | <b>Pharmacist asked question (Y/N)</b>                       |
| How long since you have the cold/cough/ fever (circle which symptom he asked)?                                                                                                                                                                                                                                                                                                                                                                                                 | 4 days                                      |                                                              |
| Is the fever high?                                                                                                                                                                                                                                                                                                                                                                                                                                                             | I haven't measured, just know I am feverish |                                                              |
| Any headache / body ache?                                                                                                                                                                                                                                                                                                                                                                                                                                                      | Occasionally                                |                                                              |
| Any sputum?                                                                                                                                                                                                                                                                                                                                                                                                                                                                    | Yes                                         |                                                              |
| <i>List any other questions he asks you and your response.</i>                                                                                                                                                                                                                                                                                                                                                                                                                 |                                             |                                                              |
| <b>Section 2 treatment.</b> <i>If no antibiotics are prescribed, ask the pharmacist the following: Can you give me a strong medicine for this. I have a lot of work to finish in the next 2 days. If cough syrup is given, record details below and at the end of the interaction say you will buy it later. If antibiotics are prescribed, ask if it is ok that you just buy today's dose for now and buy only that much. Record the details below (indicate antibiotic).</i> |                                             |                                                              |
| <b>Name of drug</b>                                                                                                                                                                                                                                                                                                                                                                                                                                                            | <b>Particulars he tells you (Y/N)</b>       | <b>Details of particulars (NA if not told)</b>               |
| 1.                                                                                                                                                                                                                                                                                                                                                                                                                                                                             | Dosage<br>Duration<br>Side effects          |                                                              |
| 2.                                                                                                                                                                                                                                                                                                                                                                                                                                                                             | Dosage<br>Duration<br>Side effects          |                                                              |
| <i>Prescribes antibiotics</i>                                                                                                                                                                                                                                                                                                                                                                                                                                                  | Y/N                                         | <i>(if Y fill particulars below, else skip to section 3)</i> |
| <b>Name of antibiotic</b>                                                                                                                                                                                                                                                                                                                                                                                                                                                      | <b>Particulars he tells you (Y/N)</b>       | <b>Details of particulars (NA if not told)</b>               |
| 1.                                                                                                                                                                                                                                                                                                                                                                                                                                                                             | Dosage<br>Duration<br>Side effects          |                                                              |
| 2.                                                                                                                                                                                                                                                                                                                                                                                                                                                                             | Dosage<br>Duration<br>Side effects          |                                                              |
| <b>Section 3 (Advice).</b> <i>List non pharmacological advice if any</i>                                                                                                                                                                                                                                                                                                                                                                                                       |                                             |                                                              |
| Advice                                                                                                                                                                                                                                                                                                                                                                                                                                                                         | Y/N                                         |                                                              |
| Steam inhalation                                                                                                                                                                                                                                                                                                                                                                                                                                                               |                                             |                                                              |
| Visit a doctor                                                                                                                                                                                                                                                                                                                                                                                                                                                                 |                                             |                                                              |
| Other (list)                                                                                                                                                                                                                                                                                                                                                                                                                                                                   |                                             |                                                              |
